# Supplementary material for: Volatile Constituents in Essential Oil from Leaves of Withania adpressa Coss. Ex Exhibit Potent Antioxidant and Antimicrobial Properties against Clinically-Relevant Pathogens
Source: MDPI journal article supplement (doi:10.3390/molecules28062839), 2023-03-21
Supplement: s1 [file s1]

### Cytotoxicity of EOW against MCF-12

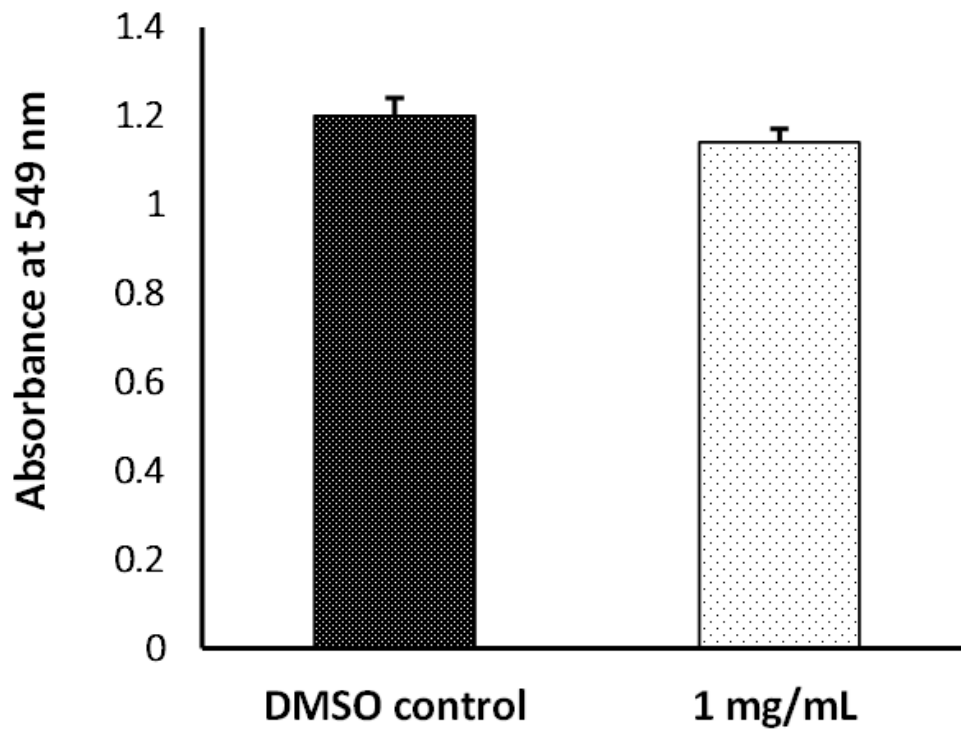

**Supplementary Figure S1.** Cytotoxicity of EOW against MCF-12, MCF-12, a normal human epithelial cells derived from mammary gland. Cells were treated with the indicated concentration of EOW (1 mg/mL) with DMSO control for 24 h followed by determination of viability by MTT assay, as detailed in the Methods section. Data represent mean  $\pm$  SD of 8 technical well-replicates.
